# Supplementary material for: Mammal-exclusion fencing improves the nesting success of an endangered native Hawaiian waterbird
Source: PeerJ journal article supplement (doi:10.7717/peerj.10722), 2021-03-01

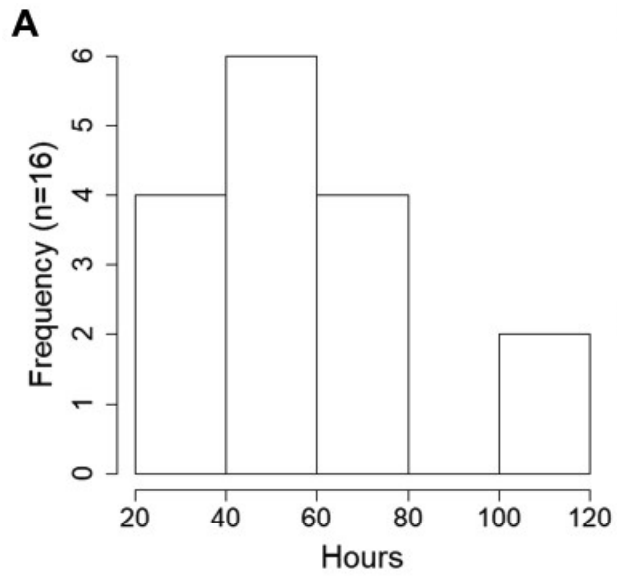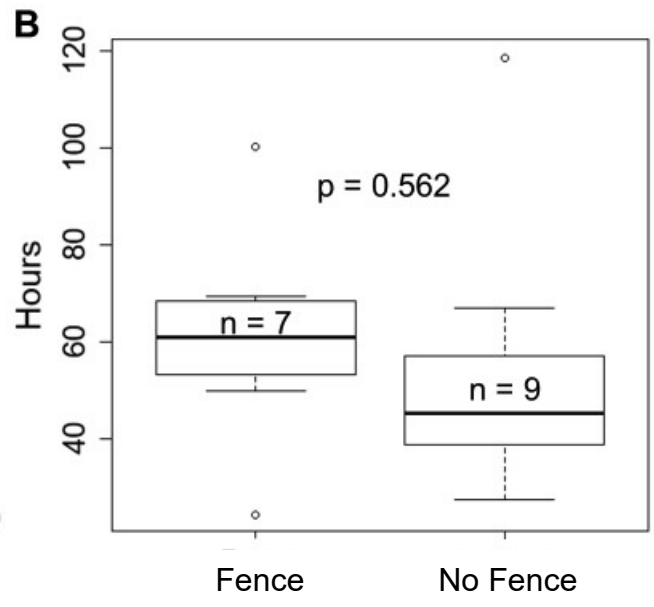

Supplement: Figure_S5.pdf [file Figure_S5.pdf]
