# Supplementary material for: Mammal-exclusion fencing improves the nesting success of an endangered native Hawaiian waterbird
Source: PeerJ. 2021 Mar 1;9:e10722. doi: 10.7717/peerj.10722 (PMC7931714; doi:10.7717/peerj.10722)
Supplement: Supplemental Information 4 [file peerj-09-10722-s004.xlsx]

## Sheet: Tracking tunnel index
RefugeUnit	Names of Surveyors	Survey Date	#Tunnels Deployed	#Tunnels with Mongoose tracks	#Tunnels with Rat tracks	#Tunnels with Mouse tracks	TRACKING INDEX (Mongooses)	TRACKING INDEX (Rats)	TRACKING INDEX (Mice)
PHR_Honouliuli	Bret W	2018-09-25	15	2	11	5	0.133333	0.733333	0.333333
PHR_Hono_Out	Bret W	2018-09-25	8	7	1	2	0.875	0.125	0.25
PHR_Waiawa	Bret W	2018-09-25	12	5	0	7	0.416667	0	0.583333
PHR_Honouliuli	Bret W	2019-04-09	14	1	1	5	0.0714286	0.0714286	0.357143
PHR_Hono_Out	Bret W	2019-04-09	6	4	4	1	0.666667	0.666667	0.166667
PHR_Waiawa	Bret W	2019-04-09	12	4	4	7	0.333333	0.333333	0.583333
PHR_Honouliuli	Ty S	2019-08-19	15	6	6	8	0.4	0.4	0.533333
PHR_Hono_Out	Ty S	2019-08-19	5	4	1	2	0.8	0.2	0.4
PHR_Waiawa	Ty S	2019-08-19	10	4	1	7	0.4	0.1	0.7
PHR_Honouliuli	Ty S	2020-08-25	16	1	3	2	0.0625	0.1875	0.125
PHR_Hono_Out	Ty S	2020-08-25	6	6	0	5	1	0	0.833333
PHR_Waiawa	Ty S	2020-08-25	10	4	4	4	0.4	0.4	0.4

## Sheet: Capture #s at PH
2018			Capture period: April 30 - December 19			Annual Captures PHNWR
	Honouliuli	Waiawa	** Government shutdown			Year	Site	Feral Cat	Mongoose	Rat	Other
Feral Cat	1	8	Dec 22, 2018 - Jan 25, 2019			2018	Honouliuli	1	28	11	23
Mongoose	28	111				2019	Honouliuli	0	88	14	84
Rat	11	12				2020	Honouliuli	0	21	11	22
Other	23	11				2018	Waiawa	8	111	12	11
						2019	Waiawa	7	149	5	44
2019			Capture period: January 28 - December 30			2020	Waiawa	11	114	7	103
	Honouliuli	Waiawa
Feral Cat	0	7				Year	Site	Feral Cat	Mongoose	Rat	Other
Mongoose	88	149				2018	Fenced	1	28	11	23
Rat	14	5				2019	Fenced	0	88	14	84
Other	84	44				2020	Fenced	0	21	11	22
						2018	Unfenced	8	111	12	11
2020			Capture period: January 2 - October 9			2019	Unfenced	7	149	5	44
	Honouliuli	Waiawa				2020	Unfenced	11	114	7	103
Feral Cat	0	11
Mongoose	21	114
Rat	11	7
Other	22	103
